# Supplementary material
Source: PubMed Central journal article supplement (PMC2690022)
Supplement: 0812937106_ST4_PDF.pdf [file 0812937106_ST4_PDF.pdf]

**Table S4. Power calculations.** A) Association using a multiplicative model. Conservatively defining genome-wide significance as  $5 \times 10^{-8}$ , we calculate power in our sample (1,829 cases and 2,250 controls), assuming prevalence  $\sim 4$  in 100,000 and a multiplicative model of gene effect as shown. B) Regression analysis of survival. Conservatively defining genome-wide significance as  $5 \times 10^{-8}$ , we calculate power in our sample (1014 cases) with four predictors (genotype, site of collection, first 2 dimensions of stratification analysis) using linear regression as shown.

A)

| <u>MAF</u> | <u>Odds ratio</u> | <u>Power (1E-05)</u> | <u>Power (5E-08)</u> |
|------------|-------------------|----------------------|----------------------|
| 0.1        | 1.1               | 0%                   | 0%                   |
|            | 1.3               | 23%                  | 4%                   |
|            | 1.5               | 93%                  | 66%                  |
| 0.3        | 1.1               | 0%                   | 0%                   |
|            | 1.3               | 87%                  | 53%                  |
|            | 1.5               | 100%                 | 100%                 |

B)

| <u>R<sup>2</sup></u> | <u>F2 (effect size)</u> | <u>Power (1E-05)</u> | <u>Power (5E-08)</u> |
|----------------------|-------------------------|----------------------|----------------------|
| 0.01                 | 0.01010                 | <15%                 | <15%                 |
| 0.02                 | 0.02041                 | 30%                  | <15%                 |
| 0.03                 | 0.03093                 | 69%                  | 31%                  |
| 0.04                 | 0.04167                 | 92%                  | 64%                  |
| 0.05                 | 0.05263                 | 98.5%                | 87%                  |
