# Supplementary material
Source: PubMed Central journal article supplement (PMC2690022)
Supplement: 0812937106_ST6_PDF.pdf [file 0812937106_ST6_PDF.pdf]

**Table S6. Breakdown of analyzed SNPs.**

|                                                           |               |
|-----------------------------------------------------------|---------------|
| SNPs in Common to All Sites of Genotyping                 | 307,776       |
| SNPs with HWE < $10^{-6}$                                 |               |
| SNPs with Genotyping Rate < 0.95                          |               |
| SNPs with minor allele frequency < 0.001                  | <u>10,360</u> |
| Remaining SNPs                                            | 297,416       |
| Test of missingness by case/control status                |               |
| Haplotype-based test for non-random missing genotype data | <u>9,059</u>  |
| Remaining SNPs                                            | 288,357       |
| Total Sample                                              | <u>4,079</u>  |
| Total Genotypes                                           | 1,176,208,203 |
